# Supplementary material
Source: PubMed Central journal article supplement (PMC4347228)
Supplement: JCI71385sd.pdf [file JCI71385sd.pdf]

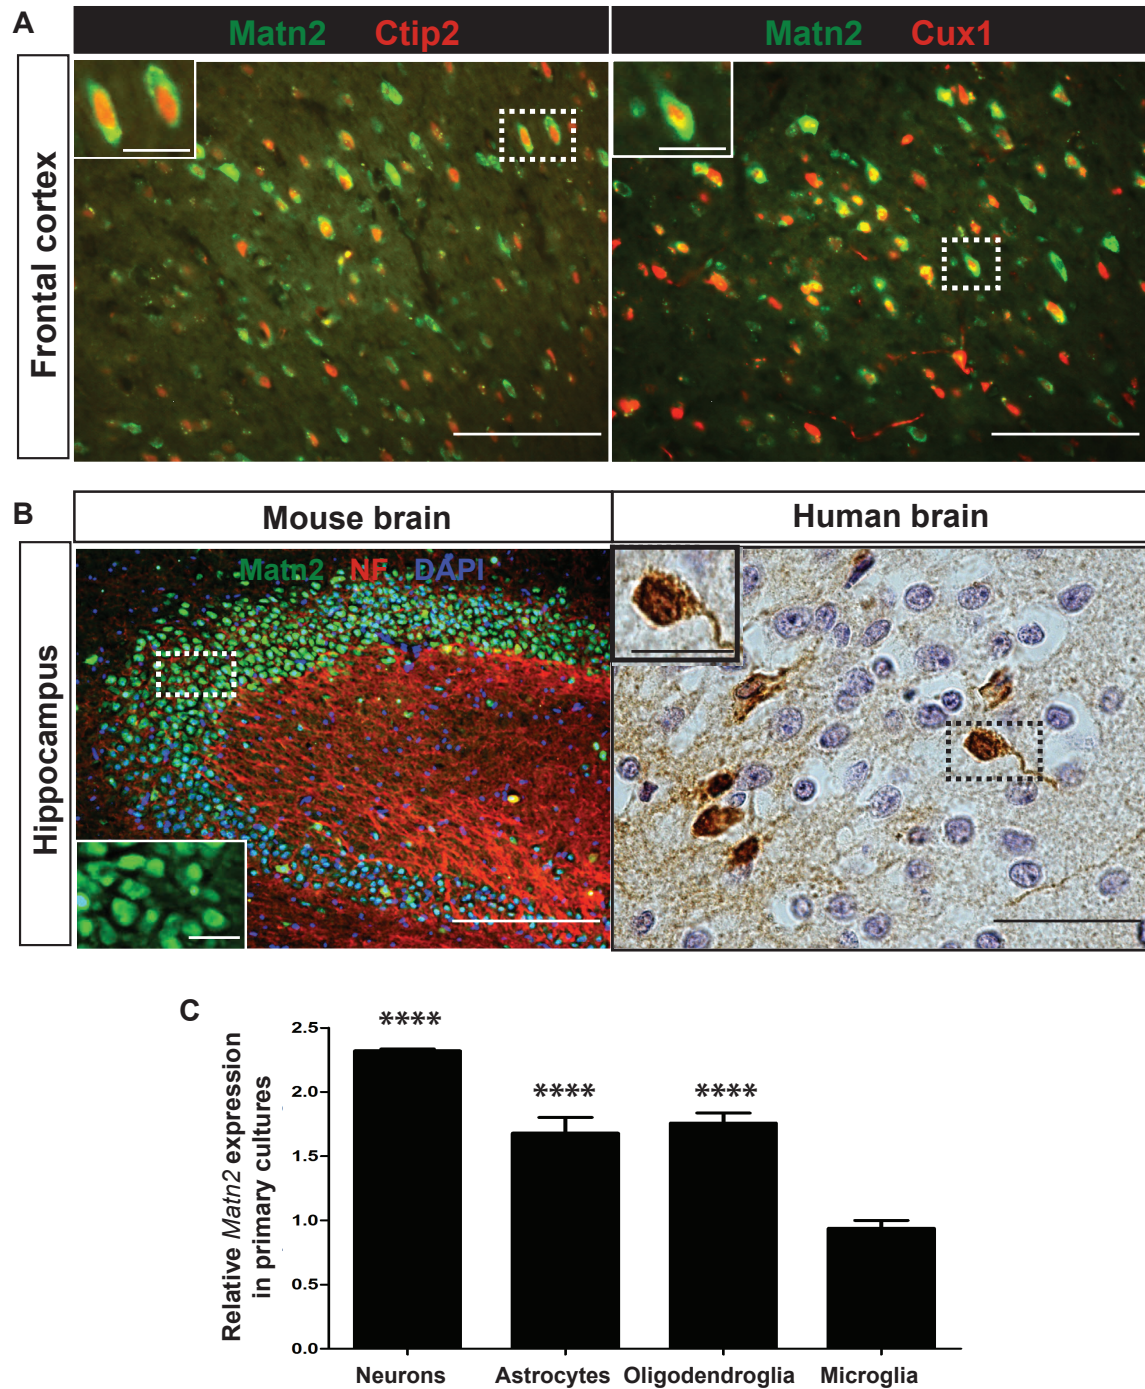

**Figure S1. *Matn2* expression in specific neurons of the brain.** (A) Co-labeling for *Matn2* and *Ctip2* (cortical layer 5 marker) or *Cux1* (cortical layer 2/3 marker) in the frontal cortex of healthy mice shows specific expression by neurons of CSMN layers. Scale bars, 50µm. (B) Co-labeling for *Matn2* and NF (pan Neurofilament marker) in the mouse hippocampus and *Matn2* IHC labeling in the hippocampus of human brain. Scale bars, 50µm. (C) *Matn2* expression (mean±SEM, qRT-PCR) in primary neuronal, astrocytic, oligodendroglial and microglial monocultures shows highest expression of *Matn2* in neurons (n=4-6/group). \*\*\*\*p<0.0001; One-way ANOVA relative to expression in microglia.

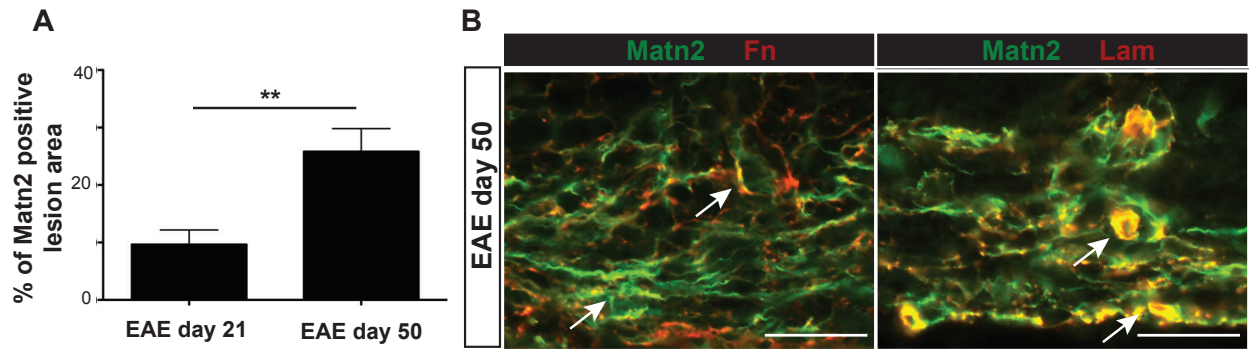

**Figure S2. Expression of Matn2 in post-acute EAE lesions.** (A) Quantitation of Matn2-positive lesional areas as a proportion of total lesion area (mean±SEM; %) at EAE day 21 and 50 (n=10/group, 2 independent cohorts). \*\* $p < 0.01$ ; Student's Ttest. (B) Co-labeling of Matn2 and fibronectin (Fn) or laminin (Lam) in lumbar spinal cord at EAE day 50 showing an association of Matn2 with the altered lesional ECM. Scale bars, 25 $\mu$ m.

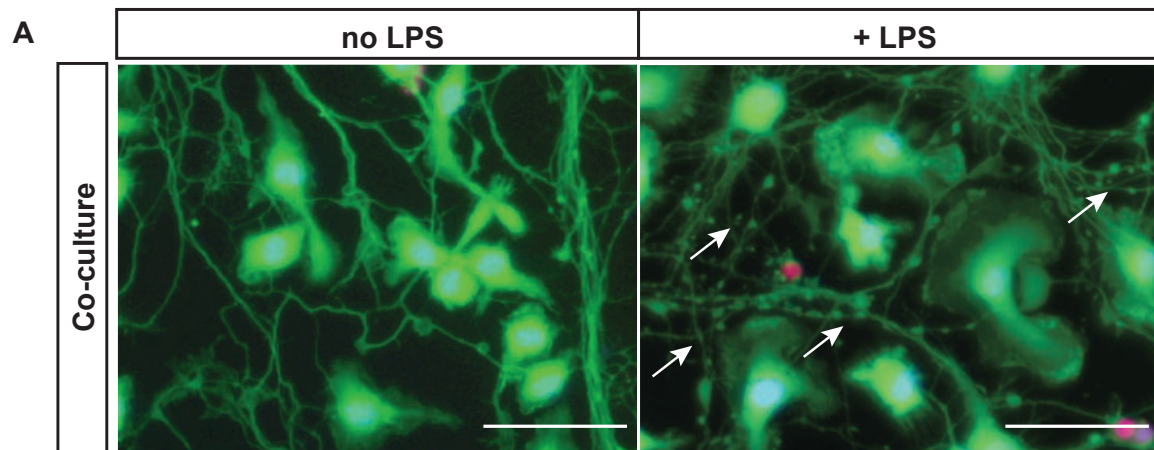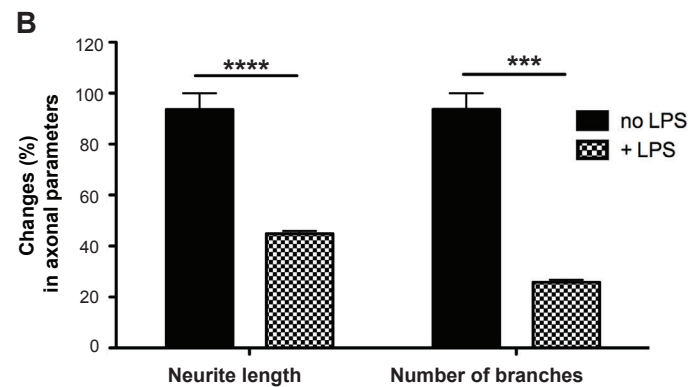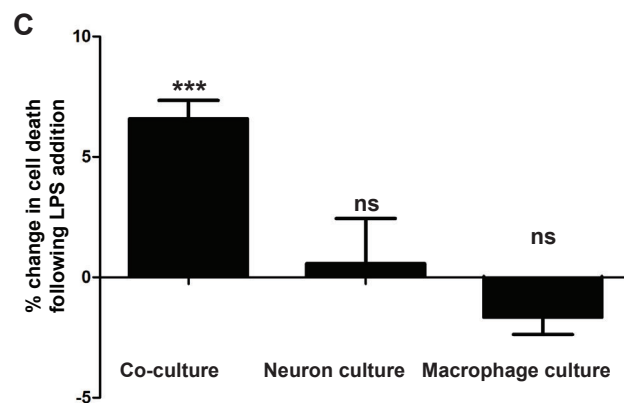

**Figure S3. Macrophage-induced axonal injury increases *Matn2* gene expression in neurons *in vitro*.** Neuron/macrophage co-cultures and respective monocultures were stained with calceinAM (green), ethidium homo-dimer (Ethd1, red) and DAPI (blue). (A) Co-cultures develop axon injury (beading and transection, arrows) 24h following LPS addition compared to untreated cultures. Scale bars, 25 $\mu$ m. (B) Assessment of neurite length and number of branches (mean $\pm$ SEM; %) of 100 neurons in co-culture after 24h LPS addition (n=3 cultures/condition, 4 independent experiments). \*\*\*\*p<0.0001; \*\*\*p<0.001; Student's Ttest. (C) Change in cell death (mean $\pm$ SEM, %) detected by Ethd1 staining in co- and monocultures after 24h LPS addition compared to untreated controls (n=3 cultures/condition, 4 independent experiments).

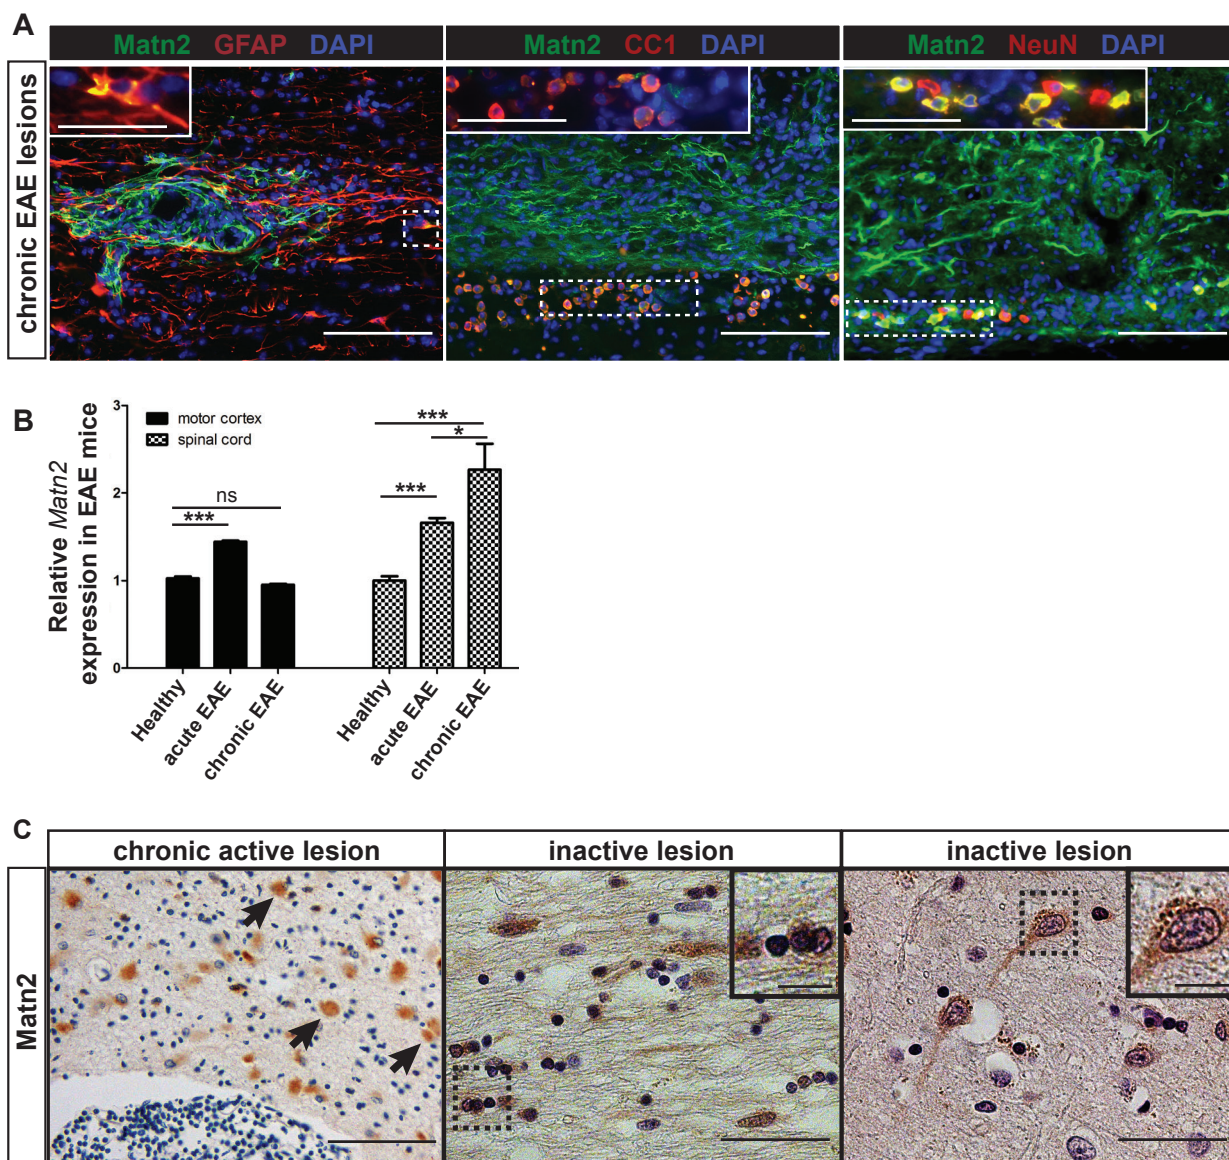

**Figure S4. Cell-specific Matn2 expression in chronic EAE and MS lesions.** (A) Co-labeling of Matn2 and GFAP, CC1 or NeuN in longitudinal lumbar cord sections at EAE day50 shows localization in astrocytes, oligodendrocytes and neurons, respectively. Nuclei were visualized with DAPI. Scale bars, 25µm and 10µm, respectively. (B) Matn2 expression (mean±SEM, qRT-PCR) in healthy and EAE mice (day21 and 50) in motor cortex and whole spinal cord (n=4-6/cohort). \*\*\*p<0.001, \*p<0.05; p≥0.5 = not significant (ns), One-way ANOVAs. (C) IHC labeling of a chronic active and inactive human MS lesions for Matn2 show widespread lesional astrocytic reactivity with Matn2 expression also found in local lesional oligodendrocytes and neurons. Scale bars, 50µm and 25µm.

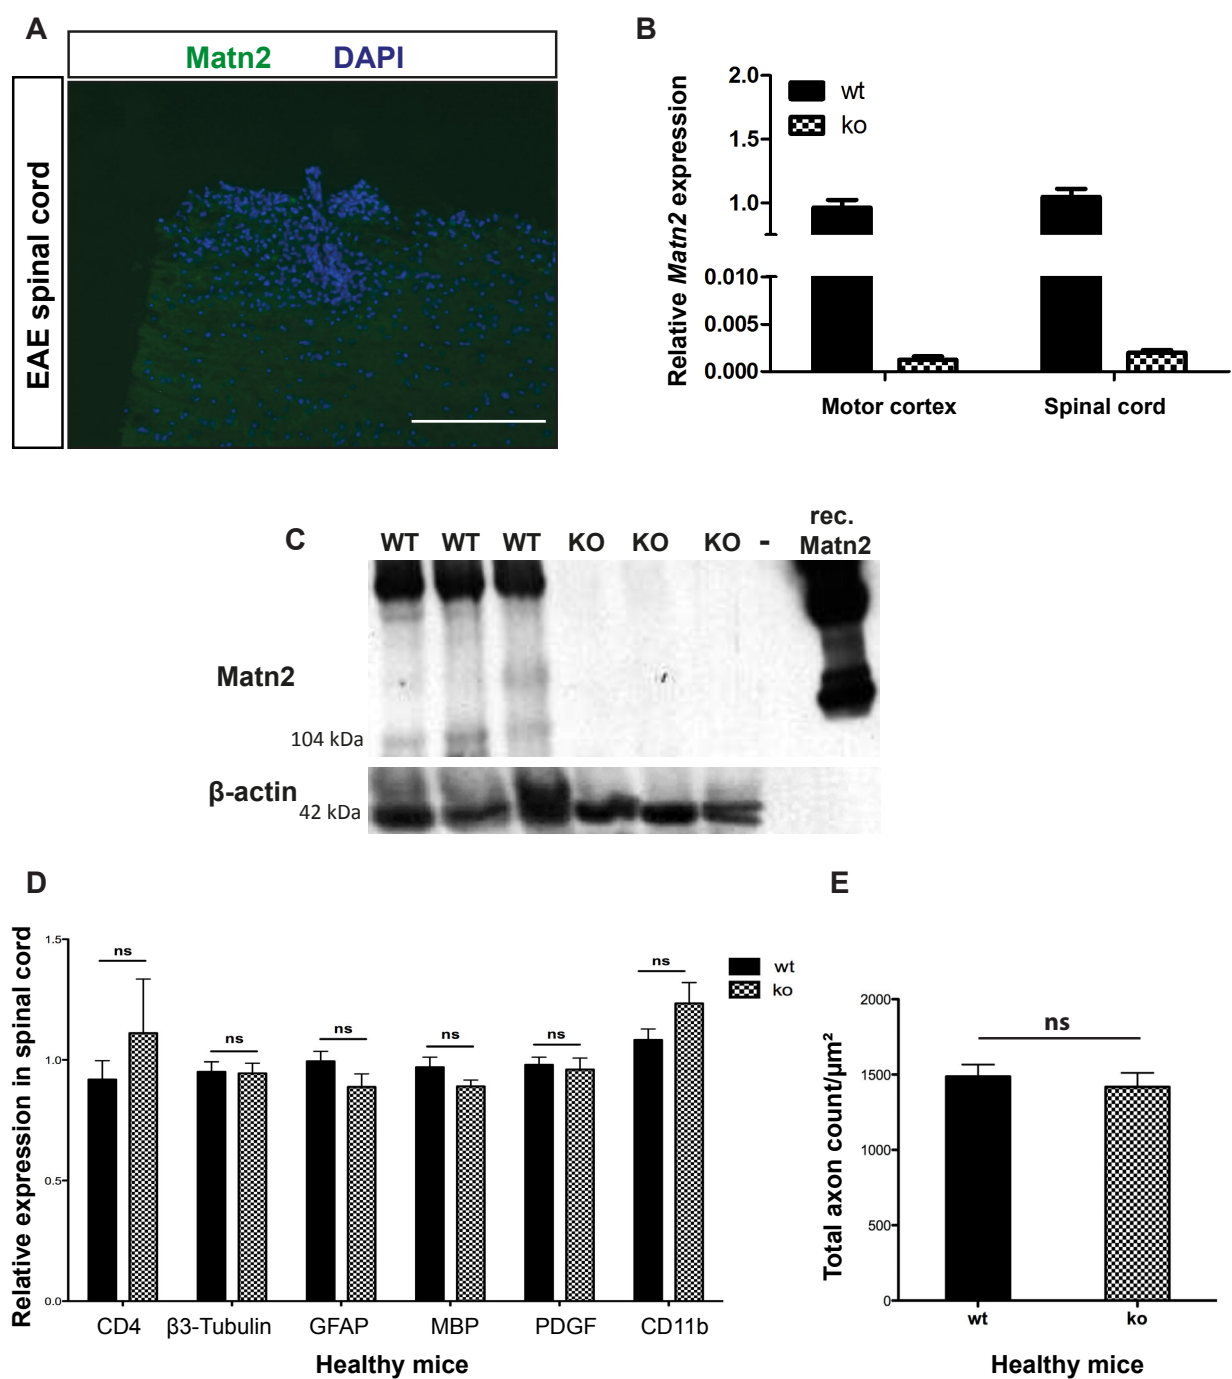

**Figure S5. Confirmation of Matn2 deletion and basic expression analysis in Matn2 ko mice.**

(A) Immunofluorescence analysis of Matn2 in longitudinal sections of lumbar spinal cord from EAE day 21 Matn2 ko mice shows absence of Matn2 staining in lesions. Nuclei were visualized with DAPI. Scale bar, 50 $\mu\text{m}$ . (B) Matn2 gene expression (mean $\pm$ SEM, qRT-PCR) in the motor cortex and whole spinal cord of Matn2 ko mice is reduced to undetectable levels compared to health mice (n=4/group). (C) Immunoblot analysis (native) for Matn2 in the frontal cortex of healthy wt and ko mice. Recombinant Matn2 was used as positive control, bands above 104kDa represent oligomeric Matn2. (D) Gene expression analysis (mean $\pm$ SEM, qRT-PCR) for CNS cell markers in spinal cord of healthy wt and Matn2 ko mice. Note that no difference in baseline expression levels was detected (n=5-7/group). p $\geq$ 0.5 = not significant (ns), Student's Ttest. (E) Axon counts (mean $\pm$ SEM) in the dorsal spinal cord column of healthy wt and Matn2 ko mice are similar (n=4-5/group). p $\geq$ 0.5 = not significant (ns); Student's Ttest.

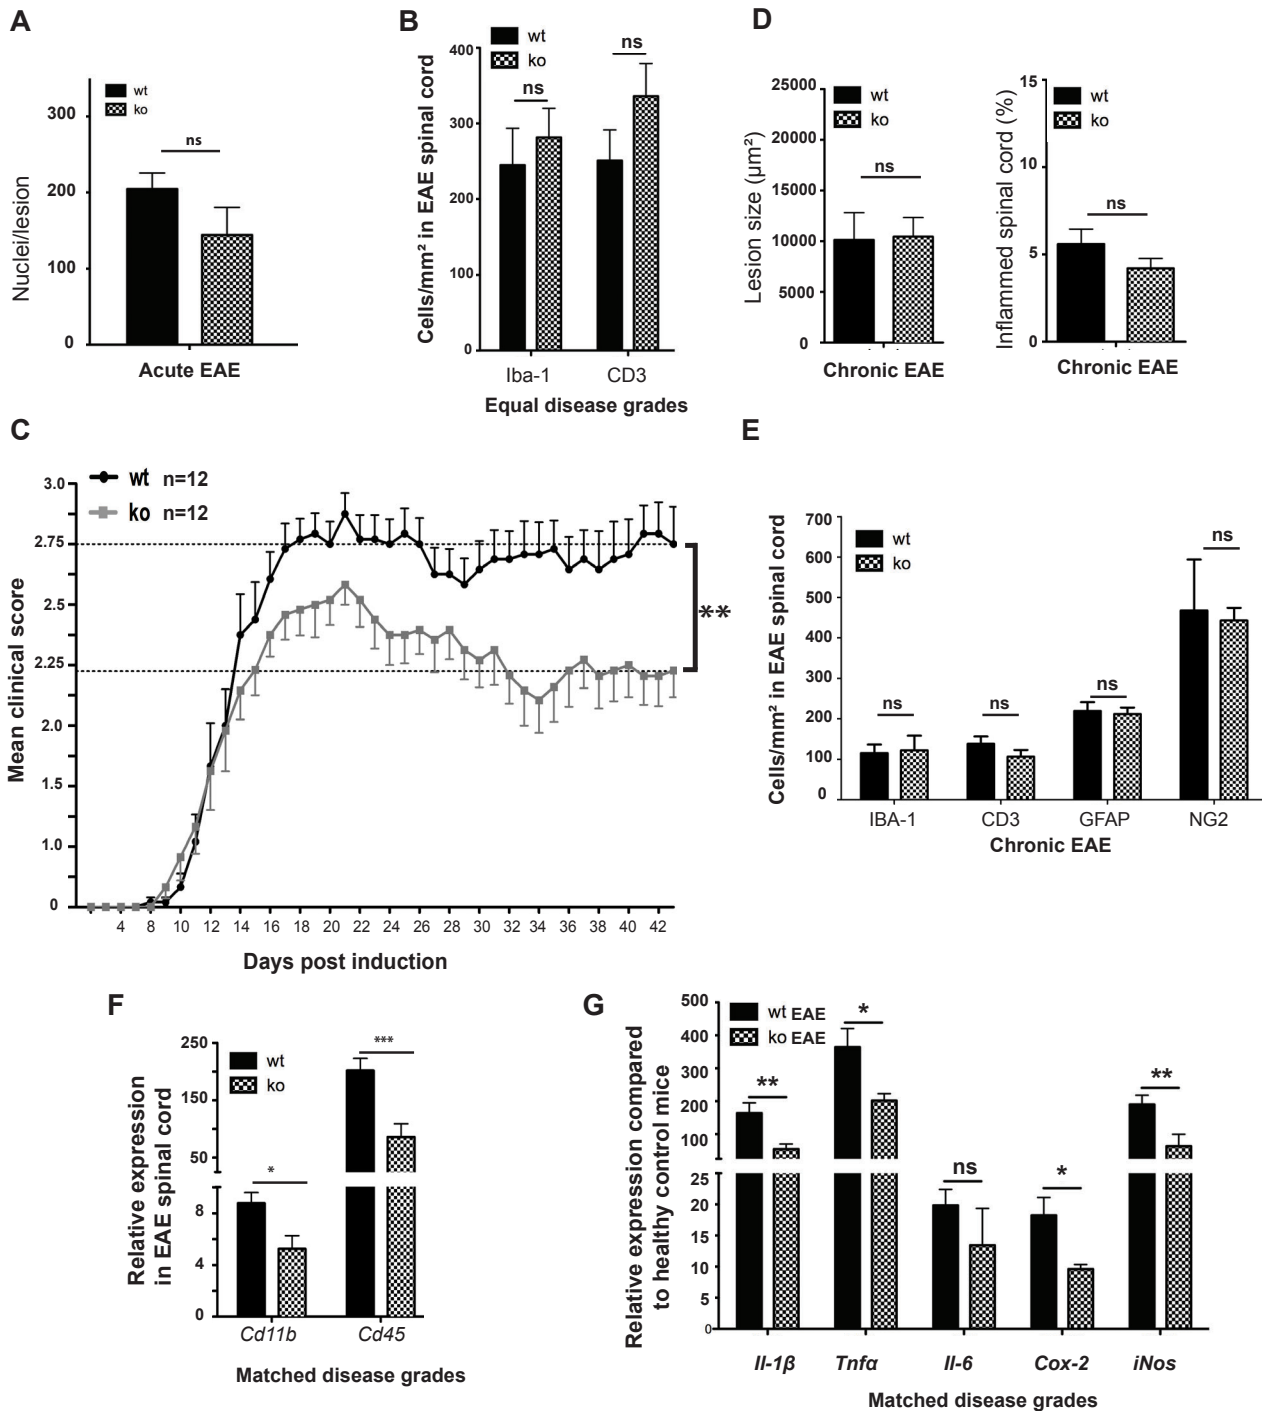

**Figure S6. Matn2 deletion attenuates disease severity in acute EAE.** (A) Comparison of EAE scores (mean±SEM) of mice surviving to day 43 in wt and Matn2 ko mice shows that EAE scores stabilise beyond EAE day 21 (n=12/group). \*\*p<0.01; Mann-Whitney rank sum test. (B) Average cell density (mean±SEM) in lumbar spinal cord lesions of wt and Matn2 ko mice is similar at EAE day21 (n=10/genotype). p≥0.5 = not significant (ns); Student's Ttest. (C) Quantification of Iba-1-positive macrophages and CD3-positive T-cell density (mean±SEM) in the lumbar spinal cord of wt and Matn2 ko mice with equal disease severities in acute EAE (n=4/cohort). \*p<0.05; Student's Ttest. (D) Comparison of lesion size and cross-sectional cord area (%) with inflammatory lesions in the lumbar spinal cord (mean±SEM) in Matn2 ko mice and wt littermates in chronic EAE (n=10/genotype). \*\*p<0.01; Student's Ttest. (E) Quantification of Iba-1-positive macrophages CD3-positive T-cells, NG2-positive oligodendroglia and GFAP-positive astrocyte density (mean±SEM) in the lumbar spinal cord of wt and Matn2 ko mice in chronic EAE (n=10/cohort). \*p<0.05; Student's Ttest. (F-G) Expression of inflammation-associated genes (mean±SEM, qRT-PCR) in whole spinal cord from acute EAE wt and Matn2 ko mice. (n=4-6/group). \*\*\*\*p<0.0001, \*\*\*p<0.001, \*\*p<0.01, p≥0.5 = not significant (ns), Student's Ttest. Note that EAE mice with matched disease grades for each genotype were compared to healthy control mice (n=4-6/group). \*\*\*p<0.001, \*\*p<0.01, \*p<0.05, p≥0.5 = not significant (ns), Student's Ttest.

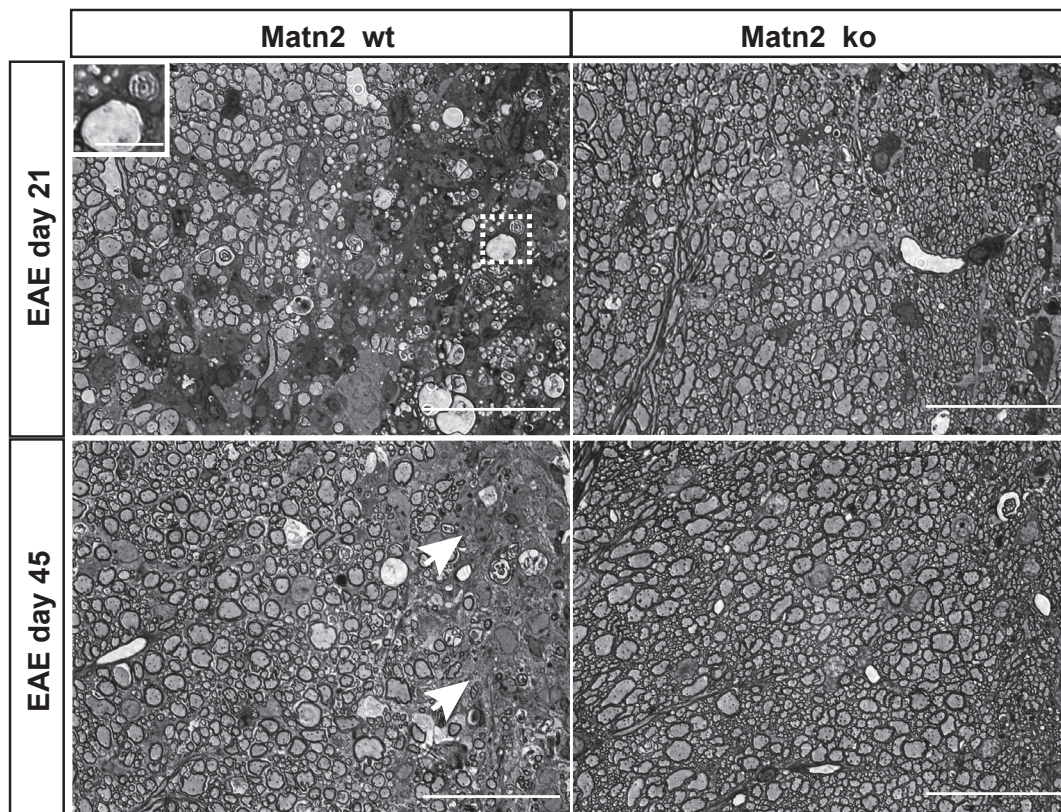

**Figure S7. Matn2 deletion reduces inflammatory gene expression and improves axonal integrity in EAE mice.** (A) Methylene-blue stained semi-thin cross-sections of the dorsal columns from EAE day 21 and 45 (converted to grey scale). Wt mice show marked inflammatory cell infiltration and abnormally shaped axons (inset) at EAE day 21 and noticeably more ECM tissue at day 45 (arrowheads) compared to their ko littermates. Scale bars, 25um.

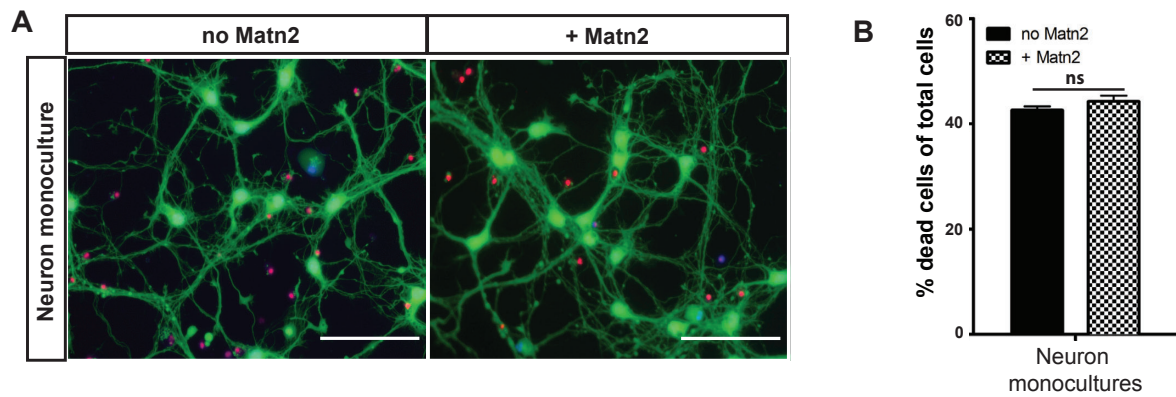

**Figure S8. Exogenous Matn2 has no effect on pure neuronal cultures.** (A) Representative images of neuronal monocultures stained with CalceinAM (green), Ethidium homodimer (Ethd1, red) and DAPI (blue) show no morphological differences following 24h incubation with Matn2 (1 $\mu$ g/ml). Scale bars, 50 $\mu$ m. (B) Proportion of dead cells (mean $\pm$ SEM, %) detected by Ethd1 staining in neuronal monocultures at 24h post Matn2 addition (1 $\mu$ g/ml) compared to untreated control cultures (n=5 cultures/condition, 3 independent experiments).  $p \geq 0.5$  = not significant (ns), Student's Ttest.



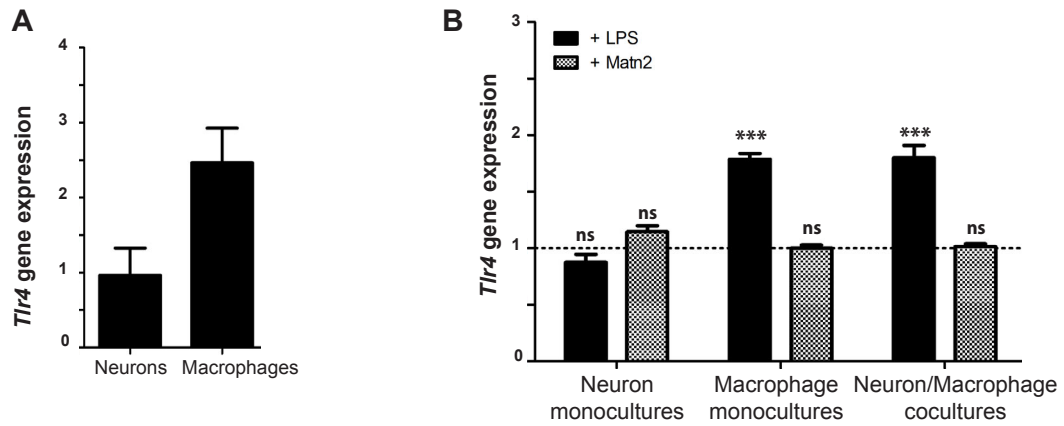

**Figure S9. Tlr4 gene expression in primary cultures.** (A) Tlr4 gene expression (mean±SEM, qRT-PCR) difference in neuron and macrophage monocultures. (B) Tlr4 gene expression changes (mean±SEM, qRT-PCR) in neuron- and macrophage monocultures and cocultures following LPS (1µg/ml) or Matn2 (1µg/ml) addition after 24h incubation. (n=4 cultures/condition, 3 independent experiments). Results are shown relative to untreated controls (dotted line). \*\*\*p<0.001; p≥0.5 = not significant (ns); Student's Ttest.

## Genes differentially expressed in the motor cortex of EAE mice (fc $\geq$ 1.3, p<0.05).

| Probe set    | Gene name                                                             | Gene symbol           | p-value  | Fold change |
|--------------|-----------------------------------------------------------------------|-----------------------|----------|-------------|
| 1418595_at   | plasma membrane associated protein, S3-12                             | S3-12                 | 2,76E-08 | 3,90        |
| 1419394_s_at | S100 calcium binding protein A8 (calgranulin A)                       | S100a8                | 2,94E-04 | 3,22        |
| 1452975_at   | alanine-glyoxylate aminotransferase 2-like 1                          | Agxt2l1               | 9,53E-08 | 3,11        |
| 1427345_a_at | sulfotransferase family 1A, phenol-preferring, member 1               | Sult1a1               | 1,39E-06 | 2,93        |
| 1417290_at   | leucine-rich alpha-2-glycoprotein 1                                   | Lrg1                  | 1,19E-07 | 2,64        |
| 1418536_at   | histocompatibility 2, Q region locus 7                                | H2-Q7                 | 3,66E-04 | 2,58        |
| 1416125_at   | FK506 binding protein 5                                               | Fkbp5                 | 2,42E-06 | 2,34        |
| 1444681_at   | ELKS/RAB6-interacting/CAST family member 2                            | Erc2                  | 1,82E-05 | 2,25        |
| 1435999_at   | serine peptidase inhibitor, Kazal type 8                              | Spink8                | 1,25E-04 | 2,21        |
| 1451006_at   | xanthine dehydrogenase                                                | Xdh                   | 8,33E-06 | 2,18        |
| 1426260_a_at | similar to UDP glycosyltransferase 1 family, polypeptide A8           | LOC632297 /// Ugt1a   | 1,86E-05 | 2,03        |
| 1455301_at   | WAS/WASL interacting protein family, member 3                         | Wipf3                 | 2,47E-05 | 1,80        |
| 1416612_at   | cytochrome P450, family 1, subfamily b, polypeptide 1                 | Cyp1b1                | 4,28E-05 | 1,79        |
| 1448231_at   | FK506 binding protein 5                                               | Fkbp5                 | 1,05E-05 | 1,76        |
| 1419442_at   | matrilin 2                                                            | Matn2                 | 2,12E-05 | 1,71        |
| 1451784_x_at | histocompatibility 2, D region locus 1                                | H2-D1                 | 1,42E-04 | 1,71        |
| 1425545_x_at | histocompatibility 2, D region locus 1                                | H2-D1                 | 1,88E-04 | 1,70        |
| 1429183_at   | plakophilin 2                                                         | Pkp2                  | 6,58E-05 | 1,70        |
| 1426261_s_at | similar to UDP glycosyltransferase 1 family, polypeptide A8           | LOC632297 /// Ugt1a   | 2,71E-05 | 1,68        |
| 1444564_at   | apolipoprotein D /// similar to apolipoprotein D                      | Apod /// LOC100047583 | 2,69E-04 | 1,63        |
| 1417495_x_at | ceruloplasmin                                                         | Cp                    | 3,38E-04 | 1,61        |
| 1435386_at   | Von Willebrand factor homolog                                         | Vwf                   | 5,85E-05 | 1,59        |
| 1455978_a_at | matrilin 2                                                            | Matn2                 | 1,90E-05 | 1,57        |
| 1417494_a_at | ceruloplasmin                                                         | Cp                    | 2,10E-04 | 1,55        |
| 1424783_a_at | similar to UDP glycosyltransferase 1 family, polypeptide A8           | LOC632297 /// Ugt1a   | 5,72E-06 | 1,55        |
| 1448397_at   | gap junction protein, beta 6                                          | Gjb6                  | 3,19E-05 | 1,50        |
| 1423619_at   | RAS, dexamethasone-induced 1                                          | Rasd1                 | 2,29E-04 | 1,49        |
| 1425428_at   | hypoxia inducible factor 3, alpha subunit                             | Hif3a                 | 1,80E-05 | 1,48        |
| 1431043_at   | kelch repeat and BTB (POZ) domain containing 5                        | Kbtbd5                | 1,44E-04 | 1,47        |
| 1457373_at   | cadherin 19, type 2                                                   | ---                   | 1,41E-04 | 1,46        |
| 1449316_at   | cytochrome P450, family 4, subfamily f, polypeptide 15                | Cyp4f15               | 2,86E-05 | 1,44        |
| 1421384_at   | lysosomal trafficking regulator                                       | Lyst                  | 1,31E-04 | 1,43        |
| 1451601_a_at | spinster homolog 2 (Drosophila)                                       | Spns2                 | 2,30E-04 | 1,43        |
| 1418306_at   | crystallin, beta B1                                                   | Crybb1                | 2,13E-05 | 1,43        |
| 1435941_at   | rhomboid, veinlet-like 3 (Drosophila)                                 | Rhbdl3                | 1,85E-04 | 1,42        |
| 1442025_a_at | zinc finger and BTB domain containing 16                              | ---                   | 6,99E-05 | 1,42        |
| 1424714_at   | aldolase C, fructose-bisphosphate                                     | Aldoc                 | 8,03E-06 | 1,41        |
| 1417629_at   | proline dehydrogenase                                                 | Prodh                 | 1,57E-04 | 1,40        |
| 1453187_at   | OCIA domain containing 2                                              | Ociad2                | 1,92E-07 | 1,39        |
| 1434674_at   | lysosomal trafficking regulator                                       | Lyst                  | 5,24E-05 | 1,38        |
| 1428223_at   | major facilitator superfamily domain containing 2                     | Mfsd2                 | 9,83E-05 | 1,38        |
| 1448392_at   | secreted acidic cysteine rich glycoprotein                            | Sparc                 | 4,77E-05 | 1,38        |
| 1435917_at   | OCIA domain containing 2                                              | Ociad2                | 8,04E-05 | 1,37        |
| 1448188_at   | uncoupling protein 2 (mitochondrial, proton carrier)                  | Ucp2                  | 1,29E-05 | 1,35        |
| 1426915_at   | death associated protein kinase 1                                     | Dapk1                 | 1,87E-04 | 1,34        |
| 1446769_at   | tetratricopeptide repeat domain 39C                                   | Ttc39c                | 2,05E-04 | 1,34        |
| 1422465_a_at | nucleoredoxin                                                         | Nxn                   | 4,37E-06 | 1,34        |
| 1424715_at   | retinol saturase (all trans retinol 13,14 reductase)                  | Retsat                | 1,75E-04 | 1,34        |
| 1416266_at   | prodynorphin                                                          | Pdyn                  | 7,52E-06 | 1,33        |
| 1420764_at   | scrapie responsive gene 1                                             | Scrg1                 | 4,26E-05 | 1,33        |
| 1417785_at   | phospholipase A1 member A                                             | Pla1a                 | 1,27E-04 | 1,32        |
| 1434203_at   | cDNA sequence BC055107                                                | BC055107              | 8,01E-05 | 1,32        |
| 1436978_at   | wingless-type MMTV integration site 9A                                | Wnt9a                 | 2,31E-04 | -1,31       |
| 1422977_at   | glycoprotein lb, beta polypeptide                                     | Gp1bb                 | 4,03E-05 | -1,31       |
| 1420877_at   | septin 6                                                              | Sep06                 | 3,43E-06 | -1,31       |
| 1454995_at   | dimethylarginine dimethylaminohydrolase 1                             | ---                   | 2,40E-04 | -1,32       |
| 1448812_at   | hippocalcin-like 1                                                    | Hpcal1                | 1,67E-04 | -1,32       |
| 1434414_at   | FAD-dependent oxidoreductase domain containing 2                      | Foxred2               | 2,65E-04 | -1,33       |
| 1424475_at   | calcium/calmodulin-dependent protein kinase kinase 2, beta            | Camkk2                | 2,62E-05 | -1,33       |
| 1416474_at   | neighbor of Punc E11                                                  | Nope                  | 3,96E-04 | -1,33       |
| 1424659_at   | slit homolog 2 (Drosophila)                                           | Slit2                 | 2,58E-04 | -1,33       |
| 1455008_at   | guanine nucleotide binding protein, alpha 12                          | ---                   | 1,20E-04 | -1,33       |
| 1451555_at   | neurolysin (metallopeptidase M3 family)                               | Nln                   | 1,34E-04 | -1,34       |
| 1422889_at   | protocadherin 18                                                      | Pcdh18                | 4,46E-05 | -1,34       |
| 1453746_at   | formin binding protein 1                                              | Fnbp1                 | 3,68E-04 | -1,35       |
| 1448502_at   | solute carrier family 16 (monocarboxylic acid transporters), member 7 | Slc16a7               | 9,37E-05 | -1,35       |
| 1418788_at   | endothelial-specific receptor tyrosine kinase                         | Tek                   | 1,25E-04 | -1,35       |
| 1426460_a_at | UDP-glucose pyrophosphorylase 2                                       | Ugp2                  | 4,52E-05 | -1,37       |
| 1418139_at   | doublecortin                                                          | Dcx                   | 3,23E-04 | -1,37       |
| 1435947_at   | TSC22 domain family, member 1                                         | ---                   | 9,82E-05 | -1,37       |
| 1433489_s_at | fibroblast growth factor receptor 2                                   | Fgfr2                 | 1,43E-05 | -1,39       |
| 1418706_at   | solute carrier family 38, member 3                                    | Slc38a3               | 1,54E-06 | -1,40       |
| 1448609_at   | thiosulfate sulfurtransferase, mitochondrial                          | Tst                   | 8,89E-05 | -1,40       |
| 1415802_at   | solute carrier family 16 (monocarboxylic acid transporters), member 1 | Slc16a1               | 2,83E-04 | -1,40       |
| 1417963_at   | phospholipid transfer protein                                         | Pltp                  | 3,33E-04 | -1,40       |
| 1433787_at   | NEL-like 1 (chicken)                                                  | Nell1                 | 2,57E-04 | -1,40       |
| 1436568_at   | junction adhesion molecule 2                                          | Jam2                  | 2,43E-05 | -1,40       |

|              |                                                                                |               |          |       |
|--------------|--------------------------------------------------------------------------------|---------------|----------|-------|
| 1436672_at   | G protein-coupled receptor kinase 5                                            | Grk5          | 1,26E-04 | -1,42 |
| 1418937_at   | deiodinase, iodothyronine, type II                                             | Dio2          | 7,81E-05 | -1,42 |
| 1428922_at   | RIKEN cDNA 1200009O22 gene                                                     | 1200009O22Rik | 6,26E-05 | -1,42 |
| 1424701_at   | protocadherin 20                                                               | Pcdh20        | 5,56E-06 | -1,42 |
| 1435171_at   | hypothetical protein LOC100046169; RIKEN cDNA 2810416G20 gene                  | 2810416G20Rik | 3,71E-04 | -1,43 |
| 1416673_at   | beta-site APP-cleaving enzyme 2                                                | Bace2         | 1,73E-05 | -1,43 |
| 1451122_at   | isopentenyl-diphosphate delta isomerase                                        | Idi1          | 7,08E-08 | -1,43 |
| 1420905_at   | interleukin 17 receptor A                                                      | Il17ra        | 1,31E-04 | -1,43 |
| 1418979_at   | aldo-keto reductase family 1, member C14                                       | Akr1c14       | 6,90E-05 | -1,43 |
| 1422706_at   | prostate transmembrane protein, androgen induced 1                             | Pmepa1        | 1,56E-04 | -1,44 |
| 1440981_at   | p21 (CDKN1A)-activated kinase 7                                                | Pak7          | 1,45E-05 | -1,45 |
| 1436642_x_at | expressed sequence AW047730                                                    | AW047730      | 1,42E-05 | -1,45 |
| 1459679_s_at | myosin IB                                                                      | Myo1b         | 2,26E-04 | -1,45 |
| 1418976_s_at | cell death-inducing DNA fragmentation factor, alpha subunit-like effector B    | Cideb         | 3,71E-04 | -1,45 |
| 1458954_at   | predicted gene 13308; similar to chemokine (C-C motif) ligand 27               | 621580        | 2,48E-04 | -1,46 |
| 1460219_at   | myelin-associated glycoprotein                                                 | Mag           | 2,48E-04 | -1,46 |
| 1420895_at   | transforming growth factor, beta receptor I                                    | Tgfb1         | 7,40E-06 | -1,47 |
| 1416444_at   | elongation of very long chain fatty acids (FEN1/Elo2, SUR4/Elo3, yeast)-like 2 | Elov2         | 3,05E-04 | -1,47 |
| 1428792_at   | breast carcinoma amplified sequence 1                                          | Bcas1         | 8,82E-05 | -1,47 |
| 1448752_at   | carbonic anhydrase 2                                                           | Car2          | 2,67E-05 | -1,47 |
| 1449514_at   | G protein-coupled receptor kinase 5                                            | Grk5          | 4,31E-05 | -1,47 |
| 1416832_at   | solute carrier family 39 (metal ion transporter), member 8                     | Slc39a8       | 1,01E-05 | -1,48 |
| 1435581_at   | beta-site APP-cleaving enzyme 2                                                | Bace2         | 1,08E-05 | -1,48 |
| 1456722_at   | chordin-like 1                                                                 | Chrd1         | 5,19E-05 | -1,49 |
| 1443888_at   | expressed sequence AU023762                                                    | AU023762      | 3,33E-07 | -1,50 |
| 1451047_at   | integral membrane protein 2A                                                   | Itm2a         | 3,22E-05 | -1,50 |
| 1423343_at   | solute carrier organic anion transporter family, member 1c1                    | Slco1c1       | 5,80E-08 | -1,50 |
| 1420904_at   | interleukin 17 receptor A                                                      | Il17ra        | 9,20E-05 | -1,51 |
| 1423608_at   | integral membrane protein 2A                                                   | Itm2a         | 1,38E-04 | -1,51 |
| 1436195_at   | cDNA sequence BC046404                                                         | BC046404      | 7,78E-06 | -1,52 |
| 1450728_at   | four jointed box 1 (Drosophila)                                                | Fjx1          | 2,18E-05 | -1,52 |
| 1438169_a_at | FERM domain containing 4B                                                      | Frm4b         | 2,04E-04 | -1,52 |
| 1428303_at   | BTB (POZ) domain containing 17                                                 | 1500005I02Rik | 3,92E-04 | -1,53 |
| 1435418_at   | solute carrier family 22 (organic anion transporter), member 8                 | Slc22a8       | 2,36E-04 | -1,53 |
| 1426314_at   | endothelin receptor type B                                                     | Ednrb         | 6,44E-06 | -1,53 |
| 1426294_at   | hyaluronan and proteoglycan link protein 1                                     | Hapln1        | 2,31E-04 | -1,53 |
| 1426973_at   | G protein-coupled receptor 153                                                 | Gpr153        | 1,13E-04 | -1,54 |
| 1439015_at   | glial cell line derived neurotrophic factor family receptor alpha 1            | Gfra1         | 2,37E-04 | -1,55 |
| 1417430_at   | cerebellar degeneration-related 2                                              | Cdr2          | 3,99E-05 | -1,56 |
| 1434984_at   | polo-like kinase 5 (Drosophila)                                                | 6330514A18Rik | 4,62E-05 | -1,57 |
| 1428700_at   | purinergic receptor P2Y, G-protein coupled 13                                  | P2ry13        | 2,07E-04 | -1,59 |
| 1456603_at   | family with sequence similarity 101, member B                                  | 1500005K14Rik | 2,88E-05 | -1,59 |
| 1448945_at   | plasma membrane proteolipid                                                    | Plip          | 1,05E-04 | -1,59 |
| 1437347_at   | endothelin receptor type B                                                     | Ednrb         | 4,97E-07 | -1,60 |
| 1416966_at   | solute carrier family 22 (organic anion transporter), member 8                 | Slc22a8       | 2,88E-04 | -1,60 |
| 1417319_at   | poliovirus receptor-related 3                                                  | Pvr3          | 3,59E-05 | -1,60 |
| 1417143_at   | lysophosphatidic acid receptor 1                                               | Lpar1         | 3,72E-04 | -1,61 |
| 1438030_at   | RAS, guanyl releasing protein 3                                                | Rasgrp3       | 2,94E-04 | -1,61 |
| 1435642_at   | proline rich region 18                                                         | Prr18         | 3,80E-05 | -1,63 |
| 1418310_a_at | retinaldehyde binding protein 1                                                | Rlbp1         | 3,96E-05 | -1,63 |
| 1425582_a_at | endomucin                                                                      | Emcn          | 4,74E-05 | -1,64 |
| 1438540_at   | collagen, type XXV, alpha 1                                                    | Col25a1       | 1,89E-05 | -1,66 |
| 1438648_x_at | RIKEN cDNA 1190003M12 gene                                                     | 1190003M12Rik | 4,26E-05 | -1,66 |
| 1437918_at   | RIKEN cDNA 4930539E08 gene                                                     | 4930539E08Rik | 6,96E-05 | -1,67 |
| 1436593_at   | RIKEN cDNA 1700016K19 gene                                                     | 1700016K19Rik | 1,47E-04 | -1,70 |
| 1444633_at   | adenylate cyclase 2                                                            | ---           | 9,74E-07 | -1,72 |
| 1439933_at   | RIKEN cDNA B430316J06 gene                                                     | B430316J06Rik | 9,99E-05 | -1,72 |
| 1451038_at   | apelin                                                                         | Apln          | 5,37E-05 | -1,75 |
| 1444089_at   | spectrin beta 2                                                                | Spnb2         | 3,22E-04 | -1,76 |
| 1438751_at   | solute carrier family 30, member 10                                            | Slc30a10      | 4,02E-04 | -1,78 |
| 1420352_at   | protease, serine, 22                                                           | Prss22        | 2,39E-04 | -1,79 |
| 1419063_at   | UDP galactosyltransferase 8A                                                   | Ugt8a         | 4,13E-05 | -1,79 |
| 1419905_s_at | hydroxyprostaglandin dehydrogenase 15 (NAD)                                    | Hpgd          | 3,81E-04 | -1,83 |
| 1434201_at   | chordin-like 1                                                                 | Chrd1         | 2,21E-05 | -1,85 |
| 1449519_at   | growth arrest and DNA-damage-inducible 45 alpha                                | Gadd45a       | 3,85E-04 | -1,85 |
| 1429286_at   | RIKEN cDNA 1190003M12 gene                                                     | 1190003M12Rik | 1,82E-04 | -1,93 |
| 1431724_a_at | purinergic receptor P2Y, G-protein coupled 12                                  | P2ry12        | 1,88E-04 | -1,99 |
| 1450779_at   | fatty acid binding protein 7, brain                                            | Fabp7         | 2,57E-06 | -2,34 |
| 1416318_at   | serine (or cysteine) peptidase inhibitor, clade B, member 1a                   | Serpinb1a     | 9,20E-05 | -2,58 |
| 1422542_at   | G protein-coupled receptor 34                                                  | Gpr34         | 9,59E-05 | -2,61 |
| 1427053_at   | ABI gene family, member 3 (NESH) binding protein                               | Abi3bp        | 7,86E-06 | -2,92 |
| 1427054_s_at | ABI gene family, member 3 (NESH) binding protein                               | Abi3bp        | 7,38E-05 | -3,24 |

**Table S1 continued. Genes differentially expressed in the motor cortex (mc) of EAE mice (fc $\geq$ 1.3, p $<$ 0.05).** List of differentially expressed genes in the motor cortex of healthy and EAE mice determined by microarray analysis (Affymetrix Moe430 2.0). The table shows the probe set number, gene name, gene symbol, p-value and fold change between healthy and EAE mice. Genes with positive values are up-regulated and genes with negative values are down-regulated in the motor cortex of EAE mice.
